# Supplementary material
Source: PubMed Central journal article supplement (PMC2950683)

**Supplemental Table 1**

| Name                   | Product size (bp) | Primer sequences                                                                     |
|------------------------|-------------------|--------------------------------------------------------------------------------------|
| VDR (mouse)            | 413               | (F) 5'-GCATGAAGCGCAAGGCCCTGTTTAC-3'<br>(R) 5'-GTGAGGGGGTGTACAGATCAG-3'               |
| CaSR (mouse)           | 899               | (F) 5'-CAGCGAGCCCAAAGAAAGG-3'<br>(R) 5'-CTTCAGACCGAACCCAATGG-3'                      |
| Cabindin D9K (mouse)   | 239               | (F) 5'-ATGTGTGCTGAGAAGTCTCCTGCAGAAATG-3'<br>(R) 5'-CATTGTGAGAGCTTTTTGAAGAAAGCTTCG-3' |
| TRPV5 (mouse)          | 283               | (F) 5'-ATTGACGGACCTGCCAATTACAGAG-3'<br>(R) 5'-GTGTTCAACCCGTAAGAACCAACGGTC-3'         |
| TRPV6 (mouse)          | 357               | (F) 5'-ATCGATGGCCCTGCGAACT-3'<br>(R) 5'-CAGAGTAGAGGCCATCTTGTGCTG-3'                  |
| CYP24 (mouse)          | 470               | (F) 5'-AAATCCAGAGCGTGCTGCCTG-3'<br>(R) 5'-ACCGTGGACAGAACGCAATGG-3'                   |
| CYP27B1 (mouse)        | 772               | (F) 5'-GCAGAGGCTCCGAAGTCTTC-3'<br>(R) 5'-TGTCTGGGACACGGGAATTC-3'                     |
| GAPDH (mouse)          | 571               | (F) 5'-TCACCATCTTCCAGGAGCG-3'<br>(R) 5'-CTGCTTCACCACCTTCTTGA-3'                      |
| TRPV6 (human)          | 328               | (F) 5'-ACTGTCATTGGGGCTATCATC-3'<br>(R) 5'-CAGCAGAATCGCATCAGGTC-3'                    |
| $\beta$ -actin (human) | 294               | (F) 5'-TTAGTTGCGTTACACCCTTTC-3'<br>(R) 5'-GTCACCTTCACCGTTCCAGTT-3'                   |

## Supplement Legends

**Supplement Figure 1:** Effect of a hCa diet and 1,25(OH)<sub>2</sub>D<sub>3</sub> on colon weights, and crypt sizes. *A*, Weights of distal colons (4 cm from rectum). Values represent the means of n = 2 mice per each treatment group; *B*, Crypt lengths assessed by micrometry of isolated crypts. Values represent the means ± SD; n = 150 crypts per each treatment group. Bars with different letters are significantly different (P < 0.05); *C*, Representative images of isolated crypts in each of the eight treatment groups. N, uninfected; Ca, hCa diet; St, standard diet (Teklad 7012); D<sub>12</sub>, day 12 post-infection; VD<sub>3</sub>, 1,25-dihydroxyvitamin D<sub>3</sub> (3 ng/g, 3 times/week). bars = 75 μm.

**Supplement Figure 2:** Effect of hCa diet and 1,25(OH)<sub>2</sub>D<sub>3</sub> on histopathology of the distal colon and the proliferating zone of colonic crypts. *A*, hematoxylin and eosin staining, X 400, bars = 100 μm. *B*, The proliferative zone of the crypts in the distal colon was detected by immunofluorescent labeling of PCNA. N, uninfected; Ca, hCa diet; St, standard diet (Teklad 7012); D<sub>12</sub>, day 12 post-infection; VD<sub>3</sub>, 1,25-dihydroxyvitamin D<sub>3</sub> (3 ng/g, 3 times/week). Quantification of PCNA-positive cells is shown in Table 1. Bars = 150 μm

Supplement Figure 1/S. Peleg

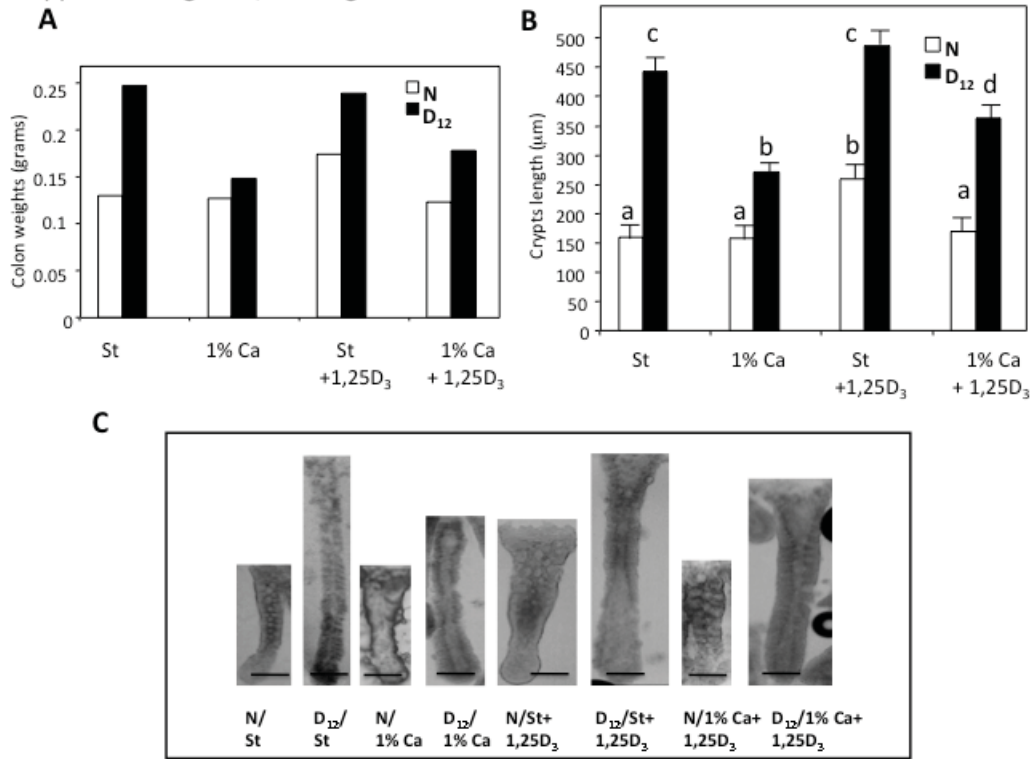

Supplement Figure 2/S. Peleg

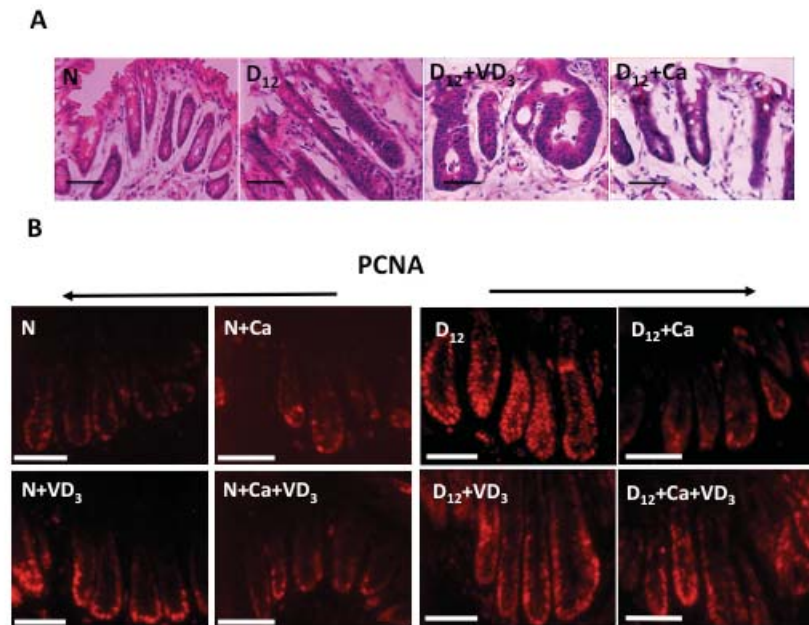

Supplement: 00193.2010_1.pdf [file 00193.2010_1.pdf]
