# Supplementary material
Source: PubMed Central journal article supplement (PMC2950683)
Supplement: 00193.2010v2_1.pdf [file 00193.2010v2_1.pdf]

Figure 1/S. Peleg

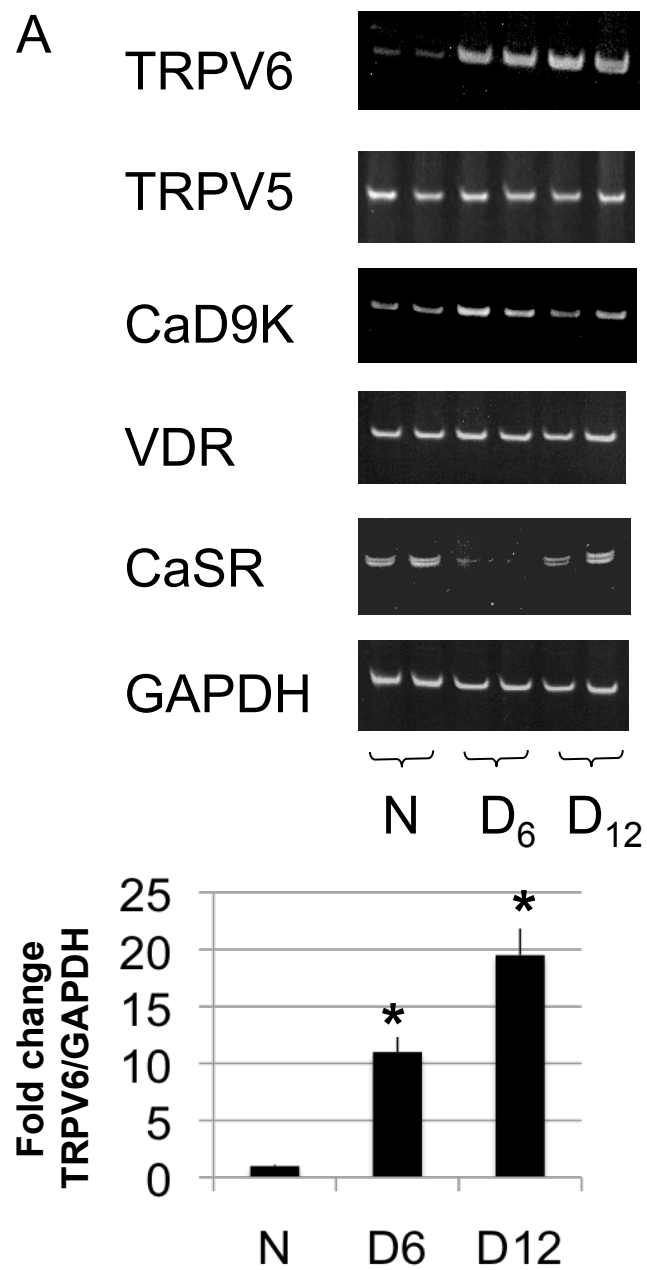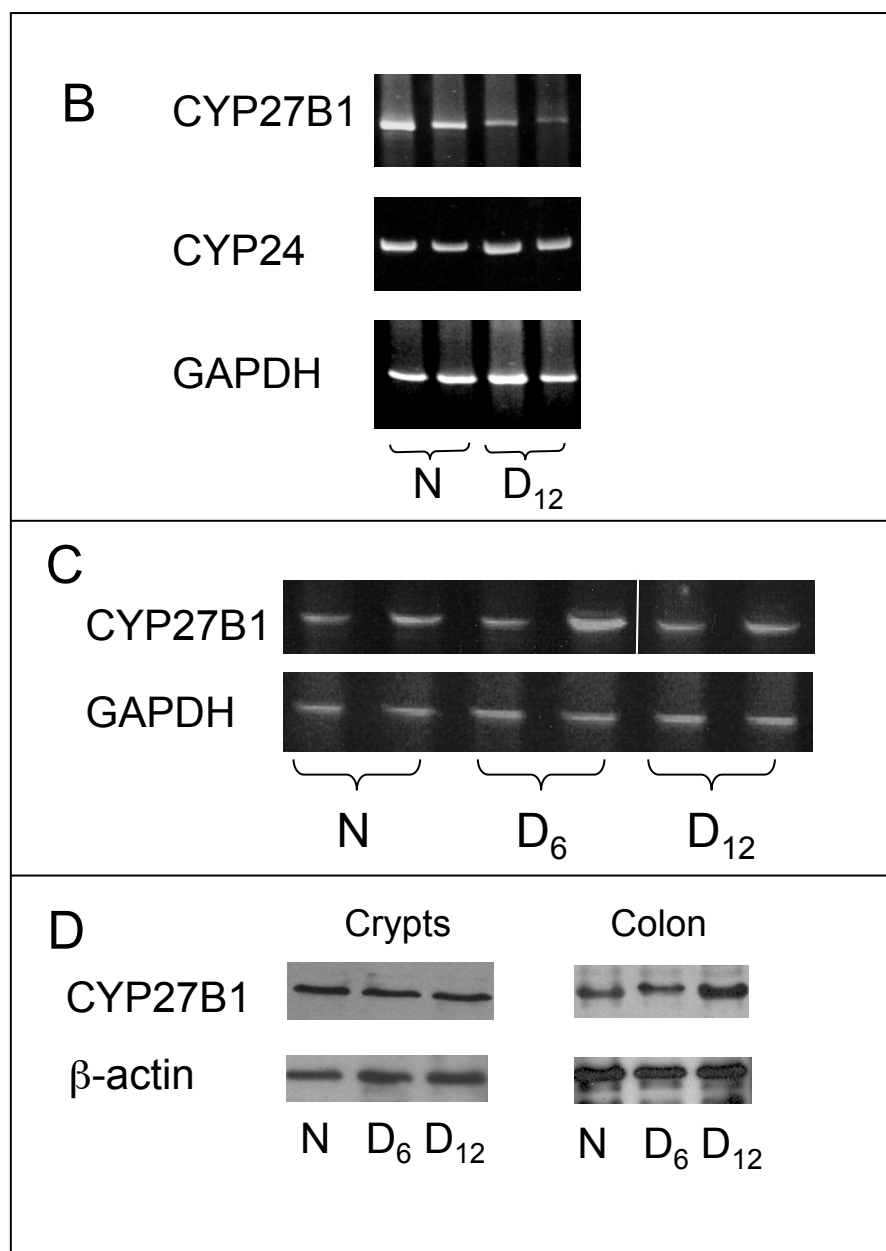

Figure 2/S. Peleg

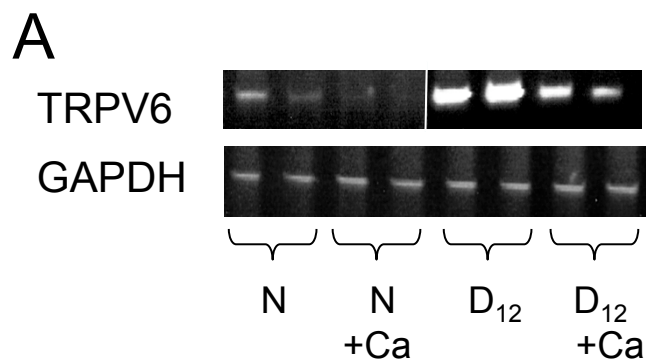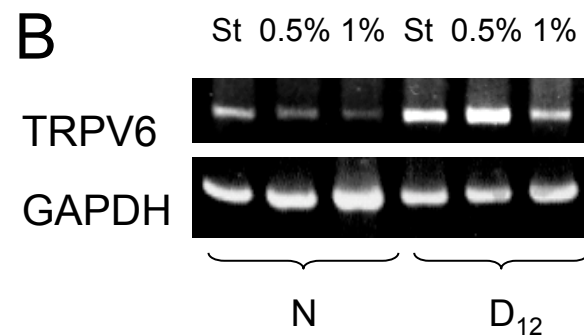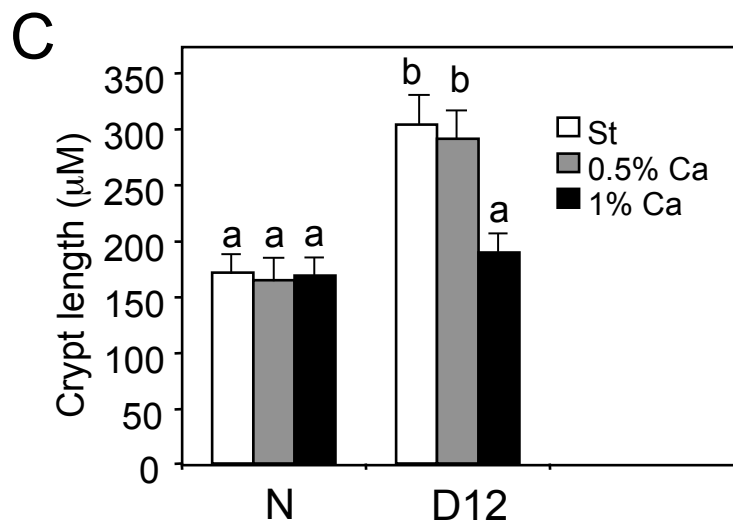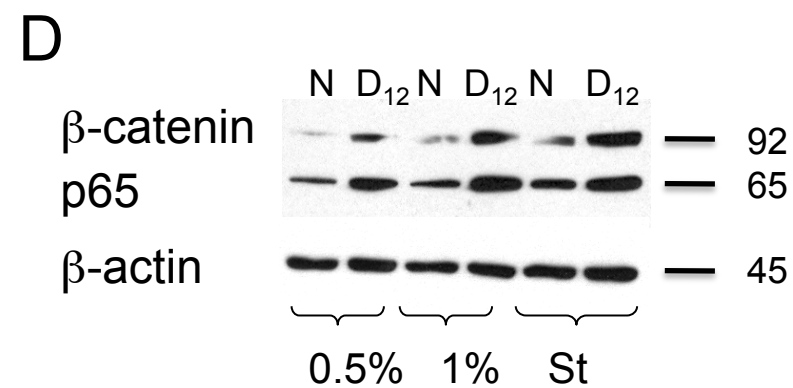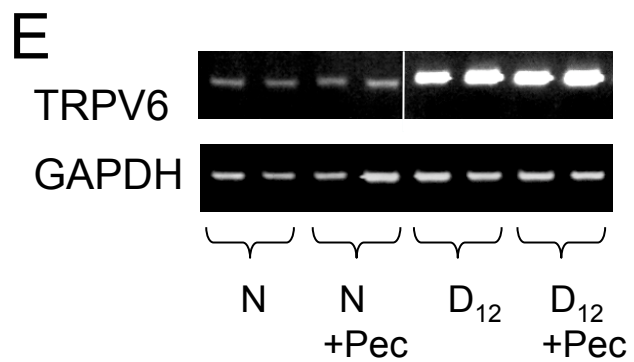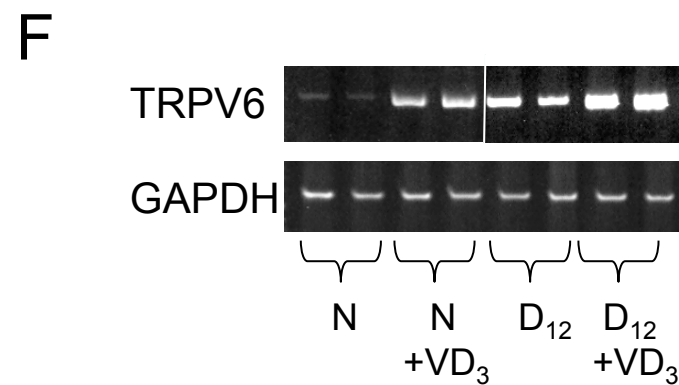

**Figure 1.** Expression of calcium-regulating genes and vitamin D–metabolizing enzymes during TMCH. *A*, Total RNA was extracted from colonic crypts isolated from either uninfected (N) or CR-infected mice 6 (D<sub>6</sub>) and 12 (D<sub>12</sub>) days postinfection. The indicated gene products were amplified by semiquantitative RT-PCR using the primers shown in Supplemental Table 1, and the relative changes in TRPV6 mRNA are shown at the bottom of this panel. Total RNA was extracted from either *B*, kidneys or *C*, colonic crypts of uninfected or infected mice; GAPDH mRNA was used as a loading control. *D*, CYP27B1 protein was assessed in tissue extracts from isolated crypts or whole distal colon homogenates by Western blotting and β-actin was used as loading control. The results shown are representative of 3 experiments each performed with 2-4 mice per treatment group. A white line was inserted in panel *C* to indicate the joining of separate fields from a single gel image.

**Figure 2.** Regulation of TRPV6 expression in colonic crypts by diet and 1,25(OH)<sub>2</sub>D<sub>3</sub>. *A*, TRPV6 expression in crypts from mice on either a standard diet or hCa diet. *B*, TRPV6 expression in crypts from mice on different diets as indicated. *C*, Bar graph of crypt length in uninfected (N) and infected (D<sub>12</sub>) colons from mice on different diets as indicated. Bars with different letters are significantly different (P < 0.05). *D*, β-catenin and p65 protein levels in whole-cell extracts isolated from colonic crypts from mice on different diets as indicated. *E*, TRPV6 expression in crypts from mice on either a standard or high pectin (6%) diet. *F*, Effect of 1,25(OH)<sub>2</sub>D<sub>3</sub> (3 ng/g, 3 days a week) on TRPV6 expression in crypts from uninfected and infected mice. The results shown are representative of 3-5 experiments each performed with 2-4 mice per treatment group.

A white line was inserted in panels *A*, *E* and *F* to indicate the joining of separate fields from a single gel image.
